# Supplementary material for: The transformation of a zero-dimensional cluster into a one-dimensional chain structure achieving a dramatically enhanced birefringence in tin(ii)-based oxalates
Source: Royal Society of Chemistry journal article supplement (doi:10.1039/d3qi01213a), 2023-01-01
Supplement: d3qi01213a1.pdf [file d3qi01213a1.pdf]

Electronic Supporting Information

**The transformation of a zero-dimensional cluster into a one-dimensional chain structure achieving a dramatically enhanced birefringence in tin(II)-based oxalates**

Liying Ren,<sup>a</sup> Linhong Cheng,<sup>a</sup> Xiaoyan Zhou,<sup>a</sup> Jinxuan Ren,<sup>a</sup> Liling Cao,<sup>\*a</sup> Ling Huang,<sup>a</sup> Xuehua Dong,<sup>a</sup> Yuqiao Zhou,<sup>b</sup> Daojiang Gao<sup>a</sup> and Guohong Zou<sup>\*b</sup>

<sup>a</sup>College of Chemistry and Materials Science, Sichuan Normal University, Chengdu, 610066, P. R. China.

<sup>b</sup>College of Chemistry, Sichuan University, Chengdu, 610065, P. R. China.

E-mail: llcao21@163.com; zough@scu.edu.cn

## Table of contents

| Sections | Titles                                                                                                                                                                                                                                                                                                                                                   | Pages |
|----------|----------------------------------------------------------------------------------------------------------------------------------------------------------------------------------------------------------------------------------------------------------------------------------------------------------------------------------------------------------|-------|
| Table S1 | Crystal data and structure refinement for $\text{K}_2\text{Sn}(\text{C}_2\text{O}_4)_2 \cdot \text{H}_2\text{O}$ and $\text{K}_2\text{Sn}_2(\text{C}_2\text{O}_4)_2\text{F}_2 \cdot \text{H}_2\text{O}$ .                                                                                                                                                | S3    |
| Table S2 | Atomic coordinates ( $\times 10^4$ ) and equivalent isotropic displacement parameters ( $\text{\AA}^2 \times 10^3$ ), and calculated Bond Valence Sum for $\text{K}_2\text{Sn}(\text{C}_2\text{O}_4)_2 \cdot \text{H}_2\text{O}$ . $U_{(\text{eq})}$ is defined as one third of the trace of the orthogonalized $U_{ij}$ tensor.                         | S4    |
| Table S3 | Atomic coordinates ( $\times 10^4$ ) and equivalent isotropic displacement parameters ( $\text{\AA}^2 \times 10^3$ ), and calculated Bond Valence Sum for $\text{K}_2\text{Sn}_2(\text{C}_2\text{O}_4)_2\text{F}_2 \cdot \text{H}_2\text{O}$ . $U_{(\text{eq})}$ is defined as one third of the trace of the orthogonalized $U_{ij}$ tensor.             | S5    |
| Table S4 | Selected bond lengths [ $\text{\AA}$ ] and angles [ $^\circ$ ] for $\text{K}_2\text{Sn}(\text{C}_2\text{O}_4)_2 \cdot \text{H}_2\text{O}$ .                                                                                                                                                                                                              | S6    |
| Table S5 | Selected bond lengths [ $\text{\AA}$ ] and angles [ $^\circ$ ] for $\text{K}_2\text{Sn}_2(\text{C}_2\text{O}_4)_2\text{F}_2 \cdot \text{H}_2\text{O}$ .                                                                                                                                                                                                  | S7    |
| Table S6 | The dihedral angles ( $\gamma$ ) between the two $\text{CO}_2$ in one $\text{C}_2\text{O}_4^{2-}$ group, polarizability anisotropy and HOMO-LUMO gap of $\text{Sn}^{2+}$ -polyhedra in $\text{K}_2\text{Sn}(\text{C}_2\text{O}_4)_2 \cdot \text{H}_2\text{O}$ , and $\text{K}_2\text{Sn}_2(\text{C}_2\text{O}_4)_2\text{F}_2 \cdot \text{H}_2\text{O}$ . | S8    |
| Table S7 | The calculation of the contribution of $\text{Sn}^{2+}$ cations and $\text{C}_2\text{O}_4^{2-}$ anions to birefringence in a unit cell in $\text{K}_2\text{Sn}(\text{C}_2\text{O}_4)_2 \cdot \text{H}_2\text{O}$ and $\text{K}_2\text{Sn}_2(\text{C}_2\text{O}_4)_2\text{F}_2 \cdot \text{H}_2\text{O}$ .                                                | S8    |
| Fig. S1  | Powder XRD patterns of $\text{K}_2\text{Sn}(\text{C}_2\text{O}_4)_2 \cdot \text{H}_2\text{O}$ and $\text{K}_2\text{Sn}_2(\text{C}_2\text{O}_4)_2\text{F}_2 \cdot \text{H}_2\text{O}$ .                                                                                                                                                                   | S8    |
| Fig. S2  | The TG curves of $\text{K}_2\text{Sn}(\text{C}_2\text{O}_4)_2 \cdot \text{H}_2\text{O}$ and $\text{K}_2\text{Sn}_2(\text{C}_2\text{O}_4)_2\text{F}_2 \cdot \text{H}_2\text{O}$ .                                                                                                                                                                         | S9    |
| Fig. S3  | XRD patterns for compounds $\text{K}_2\text{Sn}(\text{C}_2\text{O}_4)_2 \cdot \text{H}_2\text{O}$ and $\text{K}_2\text{Sn}_2(\text{C}_2\text{O}_4)_2\text{F}_2 \cdot \text{H}_2\text{O}$ after melting.                                                                                                                                                  | S9    |
| Fig. S4  | IR spectra of $\text{K}_2\text{Sn}(\text{C}_2\text{O}_4)_2 \cdot \text{H}_2\text{O}$ and $\text{K}_2\text{Sn}_2(\text{C}_2\text{O}_4)_2\text{F}_2 \cdot \text{H}_2\text{O}$ .                                                                                                                                                                            | S9    |
| Fig. S5  | The UV-vis-NIR diffuse reflectance spectrum and band gap of $\text{K}_2\text{Sn}(\text{C}_2\text{O}_4)_2 \cdot \text{H}_2\text{O}$ and $\text{K}_2\text{Sn}_2(\text{C}_2\text{O}_4)_2\text{F}_2 \cdot \text{H}_2\text{O}$ .                                                                                                                              | S10   |
| Fig. S6  | Birefringence measurement photo of $\text{K}_2\text{Sn}(\text{C}_2\text{O}_4)_2 \cdot \text{H}_2\text{O}$ and $\text{K}_2\text{Sn}_2(\text{C}_2\text{O}_4)_2\text{F}_2 \cdot \text{H}_2\text{O}$ .                                                                                                                                                       | S10   |

**Table S1.** Crystal data and structure refinement for  $\text{K}_2\text{Sn}(\text{C}_2\text{O}_4)_2 \cdot \text{H}_2\text{O}$  and  $\text{K}_2\text{Sn}_2(\text{C}_2\text{O}_4)_2\text{F}_2 \cdot \text{H}_2\text{O}$ .

| Formula                                    | $\text{K}_2\text{Sn}(\text{C}_2\text{O}_4)_2 \cdot \text{H}_2\text{O}$ | $\text{K}_2\text{Sn}_2(\text{C}_2\text{O}_4)_2\text{F}_2 \cdot \text{H}_2\text{O}$ |
|--------------------------------------------|------------------------------------------------------------------------|------------------------------------------------------------------------------------|
| Formula weight                             | 390.95                                                                 | 547.669                                                                            |
| Crystal system                             | triclinic                                                              | monoclinic                                                                         |
| Space group                                | $P-1$                                                                  | $P2_1/c$                                                                           |
| $a(\text{\AA})$                            | 6.43740(10)                                                            | 10.2509(2)                                                                         |
| $b(\text{\AA})$                            | 6.61500(10)                                                            | 9.3149(2)                                                                          |
| $c(\text{\AA})$                            | 11.8275(2)                                                             | 12.4438(3)                                                                         |
| $\alpha/^\circ$                            | 95.605(2)                                                              | 90                                                                                 |
| $\beta/^\circ$                             | 93.355(2)                                                              | 94.397(2)                                                                          |
| $\gamma/^\circ$                            | 101.985(2)                                                             | 90                                                                                 |
| $V(\text{\AA}^3)$                          | 488.712(14)                                                            | 1184.71(5)                                                                         |
| $Z$                                        | 2                                                                      | 4                                                                                  |
| $\rho(\text{calcd})(\text{g}/\text{cm}^3)$ | 2.657                                                                  | 3.071                                                                              |
| Temperature(K)                             | 299.55(10)                                                             | 302.59(10)                                                                         |
| $F(000)$                                   | 372.0                                                                  | 1013.5                                                                             |
| $\mu/\text{mm}^{-1}$                       | 3.499                                                                  | 4.985                                                                              |
| $R_1, wR_2 (I \geq 2\sigma(I))$            | 0.0284/0.0718                                                          | 0.0188/ 0.0476                                                                     |
| GOF on $F^2$                               | 1.157                                                                  | 0.995                                                                              |

$$R_1(F) = \frac{\sum ||F_o| - |F_c||}{\sum |F_o|}; wR_2(F_o^2) = [\frac{\sum w(F_o^2 - F_c^2)^2}{\sum w(F_o^2)^2}]^{1/2}$$

**Table S2.** Atomic coordinates ( $\times 10^4$ ) and equivalent isotropic displacement parameters ( $\text{\AA}^2 \times 10^3$ ), and calculated Bond Valence Sum for  $\text{K}_2\text{Sn}(\text{C}_2\text{O}_4)_2 \cdot \text{H}_2\text{O}$ .  $U_{(\text{eq})}$  is defined as one third of the trace of the orthogonalized  $U_{ij}$  tensor.

| atom | x          | y          | z          | $U_{\text{eq}}(\text{\AA}^2)$ | BVS  |
|------|------------|------------|------------|-------------------------------|------|
| Sn1  | 7457.9(3)  | 1589.8(3)  | 2292.2(2)  | 22.87(9)                      | 2.04 |
| K1   | 2551.3(10) | 600.5(10)  | 4162.1(5)  | 28.85(16)                     | 1.21 |
| K2   | 174.2(12)  | 7292.9(15) | 1148.3(6)  | 39.52(19)                     | 0.92 |
| O1   | 6839(3)    | 2467(3)    | 4218.4(17) | 24.4(4)                       | 2.09 |
| O2   | 6848(3)    | 2482(4)    | 488.8(17)  | 27.3(5)                       | 1.99 |
| O3   | 8293(4)    | 4904(3)    | 2640.9(17) | 29.0(5)                       | 2.22 |
| O4   | 4146(3)    | 1827(4)    | 2105.4(17) | 28.8(5)                       | 2.12 |
| O5   | 8892(4)    | 7699(3)    | 3909.8(19) | 30.2(5)                       | 1.96 |
| O6   | 7475(4)    | 5216(4)    | 5549.6(18) | 31.9(5)                       | 1.70 |
| O7   | 4224(3)    | 2782(4)    | 9245.2(17) | 29.2(5)                       | 1.68 |
| O8   | 3584(4)    | 7406(4)    | 2779(2)    | 38.9(6)                       | 1.92 |
| O9   | 1551(4)    | 2476(6)    | 969(2)     | 63.7(11)                      | 1.75 |
| C1   | 4940(4)    | 2554(4)    | 202(2)     | 20.6(5)                       |      |
| C2   | 7451(4)    | 4388(4)    | 4564(2)    | 20.2(5)                       |      |
| C3   | 8285(4)    | 5816(5)    | 3652(2)    | 21.7(6)                       |      |
| C4   | 3394(5)    | 2283(5)    | 1164(2)    | 26.9(6)                       |      |

**Table S3.** Atomic coordinates ( $\times 10^4$ ) and equivalent isotropic displacement parameters ( $\text{\AA}^2 \times 10^3$ ), and calculated Bond Valence Sum for  $\text{K}_2\text{Sn}_2(\text{C}_2\text{O}_4)_2\text{F}_2 \cdot \text{H}_2\text{O}$ .  $U_{\text{eq}}$  is defined as one third of the trace of the orthogonalized  $U_{ij}$  tensor.

| atom | x          | y          | z          | $U_{\text{eq}}(\text{\AA}^2)$ | BVS  |
|------|------------|------------|------------|-------------------------------|------|
| Sn1  | 1354.7(2)  | 8088.9(2)  | 4987.9(2)  | 21.00(5)                      | 1.97 |
| Sn2  | 5200.6(2)  | 6513.8(2)  | 8906.6(2)  | 19.90(5)                      | 1.95 |
| K1   | 6562.8(5)  | 9641.7(6)  | 890.8(4)   | 27.68(11)                     | 1.14 |
| K2   | 9788.0(6)  | 5020.2(8)  | 3152.5(6)  | 42.50(16)                     | 0.88 |
| F1   | 5590.0(14) | 8667.1(14) | 8959.5(11) | 24.8(3)                       | 1.01 |
| F2   | 1221.2(13) | 5932.9(15) | 4846.9(12) | 28.3(3)                       | 1.16 |
| O1   | 7230.4(16) | 6211(2)    | 8230.0(14) | 28.0(4)                       | 1.90 |
| O2   | 4920.0(15) | 6951.4(19) | 7088.1(13) | 25.1(3)                       | 2.04 |
| O3   | 2934.5(16) | 7708.8(19) | 8288.0(13) | 24.6(3)                       | 1.89 |
| O4   | 3602.9(16) | 7284(2)    | 5603.2(13) | 29.7(4)                       | 1.80 |
| O5   | 7075.9(16) | 6830.8(19) | 336.6(14)  | 26.2(4)                       | 1.85 |
| O6   | 1566.6(15) | 7779(2)    | 6810.9(13) | 25.7(3)                       | 1.97 |
| O7   | 9365.2(18) | 6722(2)    | 8406.7(16) | 35.7(4)                       | 1.89 |
| O8   | 9216.8(17) | 7241(2)    | 533.6(16)  | 38.3(5)                       | 1.81 |
| O9   | 7275.8(18) | 5487(2)    | 2461.7(16) | 35.2(4)                       | 2.40 |
| C1   | 3832(2)    | 7246(2)    | 6601.4(18) | 19.7(4)                       |      |
| C2   | 8270(2)    | 6590(2)    | 8763.7(19) | 21.9(4)                       |      |
| C3   | 8187(2)    | 6913(2)    | 9983.6(19) | 21.2(4)                       |      |
| C4   | 2678(2)    | 7604(2)    | 7302.1(17) | 19.1(4)                       |      |

**Table S4.** Selected bond lengths [Å] and angles [°] for  $\text{K}_2\text{Sn}(\text{C}_2\text{O}_4)_2 \cdot \text{H}_2\text{O}$ .

|                                        |                  |                        |            |
|----------------------------------------|------------------|------------------------|------------|
| Sn1-O1                                 | 2.373(2)         | K2-O7 <sup>ix</sup>    | 2.832(2)   |
| Sn1-O2                                 | 2.301(2)         | K2-O8                  | 2.820(3)   |
| Sn1-O3                                 | 2.138(2)         | K2-O9 <sup>ix</sup>    | 2.711(3)   |
| Sn1-O4                                 | 2.170(2)         | K2-O9 <sup>iii</sup>   | 3.389(4)   |
| K1-O1 <sup>iii</sup>                   | 2.774(2)         | O1-C2                  | 1.268(3)   |
| K1-O1 <sup>vi</sup>                    | 2.991(2)         | O2-C1                  | 1.267(3)   |
| K1-O4 <sup>iii</sup>                   | 2.822(2)         | O3-C3                  | 1.286(4)   |
| K1-O5 <sup>iv</sup>                    | 2.740(2)         | O4-C4                  | 1.276(4)   |
| K1-O5                                  | 2.693(2)         | O5-C3                  | 1.228(4)   |
| K1-O6 <sup>iv</sup>                    | 2.759(3)         | O6-C2                  | 1.236(3)   |
| K1-O8                                  | 2.760(2)         | O7-C1                  | 1.232(3)   |
| K2-O2 <sup>viii</sup>                  | 2.796(2)         | O9-C4                  | 1.230(4)   |
| K2-O3                                  | 2.661(2)         | C1-C4                  | 1.554(4)   |
| K2-O5                                  | 3.414(2)         | C2-C3                  | 1.550(4)   |
| O2-Sn1-O1                              | <b>141.47(7)</b> | Sn1-O3-K2              | 121.82(9)  |
| O3-Sn1-O1                              | 72.32(7)         | Sn1-O4-K1 <sup>i</sup> | 103.3(2)   |
| O3-Sn1-O2                              | 80.34(8)         | C4-O4-Sn1              | 119.24(19) |
| O5-K1-O1 <sup>iv</sup>                 | 161.48(7)        | C4-O4-K1 <sup>i</sup>  | 136.97(19) |
| O5 <sup>iii</sup> -K1-O1 <sup>vi</sup> | 79.23(6)         | O7-C1-O2               | 126.1(3)   |
| O5 <sup>iii</sup> -K1-O4 <sup>iv</sup> | 139.22(7)        | O7-C1-C4               | 118.5(3)   |
| O2 <sup>viii</sup> -K2-O5              | 151.69(6)        | O1-C2-C3               | 117.4(3)   |
| O3-K2-O5                               | 40.47(6)         | O6-C2-O1               | 126.7(3)   |
| C2-O1-Sn1                              | 113.94(17)       | O5-C3-O3               | 123.7(3)   |
| Sn1-O2-K2 <sup>viii</sup>              | 123.81(8)        | O5-C3-C2               | 120.3(3)   |
| O9-C4-O4                               | 124.7(3)         | O4-C4-C1               | 119.0(3)   |

Symmetry codes:

(i)  $-1+x, -1+y, +z$ ; (ii)  $+x, -1+y, +z$ ; (iii)  $1+x, 1+y, +z$ ; (iv)  $2-x, 2-y, 1-z$ ; (v)  $3-x, 2-y, 1-z$ ; (vi)  $2-x, 1-y, 1-z$ ; (vii)  $+x, 1+y, +z$ ; (viii)  $2-x, 1-y, -z$ ; (ix)  $1-x, 1-y, -z$ .(i)  $-1+x, -1+y, +z$ ; (ii)  $+x, -1+y, +z$ ; (iii)  $2-x, 2-y, 1-z$ ; (iv)  $1+x, 1+y, +z$ ; (v)  $3-x, 2-y, 1-z$ ; (vi)  $2-x, 1-y, 1-z$ ; (vii)  $+x, 1+y, +z$ ; (viii)  $2-x, 1-y, -z$ ; (ix)  $1-x, 1-y, -z$ .

**Table S5.** Selected bond lengths [Å] and angles [°] for K<sub>2</sub>Sn<sub>2</sub>(C<sub>2</sub>O<sub>4</sub>)<sub>2</sub>F<sub>2</sub>·H<sub>2</sub>O.

|                                         |            |                                       |            |
|-----------------------------------------|------------|---------------------------------------|------------|
| Sn1-F2                                  | 2.0197(14) | K2-O6 <sup>ii</sup>                   | 2.9560(19) |
| Sn1-O4                                  | 2.4877(17) | K2-O6 <sup>vii</sup>                  | 3.2834(18) |
| Sn1-O6                                  | 2.2806(17) | K2-O9                                 | 2.687(2)   |
| Sn2-F1                                  | 2.0451(13) | O1-C2                                 | 1.262(3)   |
| Sn2-O1                                  | 2.3209(17) | O2-K1 <sup>vii</sup>                  | 2.7645(17) |
| Sn2-O2                                  | 2.2957(17) | O2-C1                                 | 1.258(3)   |
| Sn2-O5                                  | 2.5347(18) | O3-C4                                 | 1.239(3)   |
| K1-F1                                   | 2.6883(15) | O4-C1                                 | 1.247(3)   |
| K1-F1 <sup>iv</sup>                     | 2.7293(15) | O5-C3                                 | 1.254(3)   |
| K1-F2 <sup>v</sup>                      | 2.7874(15) | O6-C4                                 | 1.262(3)   |
| K1-O1 <sup>vi</sup>                     | 3.0441(18) | O7-K2 <sup>ix</sup>                   | 3.085(2)   |
| K1-O2 <sup>vi</sup>                     | 2.7644(17) | O7-K2 <sup>viii</sup>                 | 2.722(2)   |
| K1-O3 <sup>iv</sup>                     | 2.7055(18) | O7-C2                                 | 1.245(3)   |
| K1-O4 <sup>v</sup>                      | 3.082(2)   | O8-K2 <sup>v</sup>                    | 3.187(2)   |
| K1-O5                                   | 2.7683(19) | O8-C3                                 | 1.251(3)   |
| K2-F2                                   | 2.6177(16) | C1-C4                                 | 1.558(3)   |
| K2-F2 <sup>ii</sup>                     | 2.9071(16) | C2-C3                                 | 1.556(3)   |
| F2-Sn1-O4                               | 77.42(6)   | O7 <sup>iii</sup> -K2-O8 <sup>i</sup> | 142.02(6)  |
| O6-Sn1-O4                               | 68.92(5)   | Sn2-F1-K1 <sup>iv</sup>               | 114.29(6)  |
| O8 <sup>iii</sup> -Sn1-O4               | 136.87(6)  | K1-F1-K1 <sup>iv</sup>                | 89.46(4)   |
| F1-Sn2-O1                               | 87.28(6)   | Sn1-F2-K2 <sup>ii</sup>               | 104.80(6)  |
| O1-Sn2-O5                               | 67.42(6)   | K1 <sup>i</sup> -F2-K2 <sup>ii</sup>  | 120.19(5)  |
| O2-Sn2-O5                               | 134.61(6)  | K2-F2-K1 <sup>i</sup>                 | 90.91(5)   |
| F1-K1-F1 <sup>iv</sup>                  | 90.54(4)   | C2-O1-K1 <sup>vii</sup>               | 134.04(14) |
| F1 <sup>iv</sup> -K1-F2 <sup>v</sup>    | 117.19(5)  | Sn2-O2-K1 <sup>vii</sup>              | 113.61(6)  |
| F1-K1-O1 <sup>vi</sup>                  | 143.85(5)  | C1-O4-Sn1                             | 114.50(14) |
| F1 <sup>iv</sup> -K1-O2 <sup>vi</sup>   | 75.17(5)   | C3-O5-K1                              | 102.97(14) |
| F1 <sup>iv</sup> -K1-O5                 | 137.14(5)  | K2 <sup>ii</sup> -O6-K2 <sup>vi</sup> | 105.25(5)  |
| O3 <sup>iv</sup> -K1-F1 <sup>iv</sup>   | 65.12(5)   | Sn1 <sup>ix</sup> -O8-K2 <sup>v</sup> | 89.18(6)   |
| O3 <sup>iv</sup> -K1-O5                 | 157.30(5)  | C3-O8-Sn1 <sup>ix</sup>               | 124.96(15) |
| O3 <sup>iv</sup> -K1-C3                 | 138.47(6)  | O2-C1-C4                              | 117.40(19) |
| F2 <sup>ii</sup> -K2-O6 <sup>ii</sup>   | 61.25(4)   | O4-C1-O2                              | 125.3(2)   |
| F2 <sup>ii</sup> -K7-O3                 | 70.88(5)   | O7-C2-O1                              | 126.0(2)   |
| O7 <sup>viii</sup> -K2-F2 <sup>ii</sup> | 125.61(6)  | O5-C3-C2                              | 116.7(2)   |

Symmetry codes:

(i) 1-x, -1/2+y, 3/2-z; (ii) -x, 1-y, 1-z; (iii) -1+x, 3/2-y, -1/2+z; (iv) 1-x, 2-y, 2-z; (v) 1-x, 1/2+y, 3/2-z; (vi) +x, 3/2-y, 1/2+z; (vii) +x, 3/2-y, -1/2+z; (viii) 1-x, 1-y, 1-z; (ix) 1+x, 3/2-y, 1/2+z.

**Table S6.** The dihedral angles ( $\gamma$ ) between the two  $\text{CO}_2$  in one  $\text{C}_2\text{O}_4^{2-}$  group, polarizability anisotropy and HOMO-LUMO gap of  $\text{Sn}^{2+}$ -polyhedra in  $\text{K}_2\text{Sn}(\text{C}_2\text{O}_4)_2 \cdot \text{H}_2\text{O}$  and  $\text{K}_2\text{Sn}_2(\text{C}_2\text{O}_4)_2\text{F}_2 \cdot \text{H}_2\text{O}$ .

| formula                                                                                         | groups                            | $\gamma$ | polarizability anisotropy | HOMO-LUMO gap (eV) |
|-------------------------------------------------------------------------------------------------|-----------------------------------|----------|---------------------------|--------------------|
| $\text{K}_2\text{Sn}(\text{C}_2\text{O}_4)_2 \cdot \text{H}_2\text{O}$<br>(hkl:010)             | $\text{C}_2\text{O}_4^{2-}$ (I)   | 1.512    | 22.30                     | 5.68               |
|                                                                                                 | $\text{C}_2\text{O}_4^{2-}$ (II)  | 6.736    | 22.20                     | 5.72               |
|                                                                                                 | $\text{Sn}^{2+}$ (I)              | —        | 35.14                     | 1.85               |
| $\text{K}_2\text{Sn}_2(\text{C}_2\text{O}_4)_2\text{F}_2 \cdot \text{H}_2\text{O}$<br>(hkl:010) | $\text{C}_2\text{O}_4^{2-}$ (III) | 6.571    | 22.60                     | 5.63               |
|                                                                                                 | $\text{C}_2\text{O}_4^{2-}$ (IV)  | 2.482    | 22.40                     | 5.67               |
|                                                                                                 | $\text{Sn}^{2+}$ (II)             | —        | 106.50                    | 1.50               |
|                                                                                                 | $\text{Sn}^{2+}$ (III)            | —        |                           |                    |

**Table S7.** The calculation of the contribution of  $\text{Sn}^{2+}$  cations and  $\text{C}_2\text{O}_4^{2-}$  anions to birefringence in a unit cell in  $\text{K}_2\text{Sn}(\text{C}_2\text{O}_4)_2 \cdot \text{H}_2\text{O}$  and  $\text{K}_2\text{Sn}_2(\text{C}_2\text{O}_4)_2\text{F}_2 \cdot \text{H}_2\text{O}$ .

| formula                                                                                         | groups                            | $n$ | $\rho$ | $\alpha/\beta$ | $\text{Cosa}/\text{Cos}\beta$ | $\rho \times \text{Cosa}/\rho \times \text{Cos}\beta$ | Contribution percentage (%) |
|-------------------------------------------------------------------------------------------------|-----------------------------------|-----|--------|----------------|-------------------------------|-------------------------------------------------------|-----------------------------|
| $\text{K}_2\text{Sn}(\text{C}_2\text{O}_4)_2 \cdot \text{H}_2\text{O}$<br>(hkl:010)             | $\text{C}_2\text{O}_4^{2-}$ (I)   | 2   | 0.0041 | 82.579         | 0.1637                        | 0.0007                                                | 61.04                       |
|                                                                                                 | $\text{C}_2\text{O}_4^{2-}$ (II)  | 2   | 0.0041 | 9.817          | 0.9854                        | 0.0040                                                |                             |
|                                                                                                 | $\text{Sn}^{2+}$ (I)              | 2   | 0.0041 | 42.345         | 0.7391                        | 0.0030                                                | 38.96                       |
| $\text{K}_2\text{Sn}_2(\text{C}_2\text{O}_4)_2\text{F}_2 \cdot \text{H}_2\text{O}$<br>(hkl:010) | $\text{C}_2\text{O}_4^{2-}$ (III) | 4   | 0.0034 | 13.454         | 0.9726                        | 0.0033                                                | 49.62                       |
|                                                                                                 | $\text{C}_2\text{O}_4^{2-}$ (IV)  | 4   | 0.0034 | 15.859         | 0.9619                        | 0.0033                                                |                             |
|                                                                                                 | $\text{Sn}^{2+}$ (II)             | 4   | 0.0034 | 6.085          | 0.9944                        | 0.0034                                                | 50.38                       |
|                                                                                                 | $\text{Sn}^{2+}$ (III)            | 4   | 0.0034 | 11.266         | 0.9807                        | 0.0033                                                |                             |

$n$ : the number of  $\text{Sn}^{2+}$  cations or  $\text{C}_2\text{O}_4^{2-}$  in a unit cell.  $\rho$ : the density of  $\text{Sn}^{2+}$  cations or  $\text{C}_2\text{O}_4^{2-}$  in a unit cell.  $\alpha$ : The angle between the of direction the lone pair electron of  $\text{Sn}^{2+}$  and  $YZ$  plane.  $\beta$ : the dihedral angle between  $\text{C}_2\text{O}_4^{2-}$  plane and  $YZ$  plane

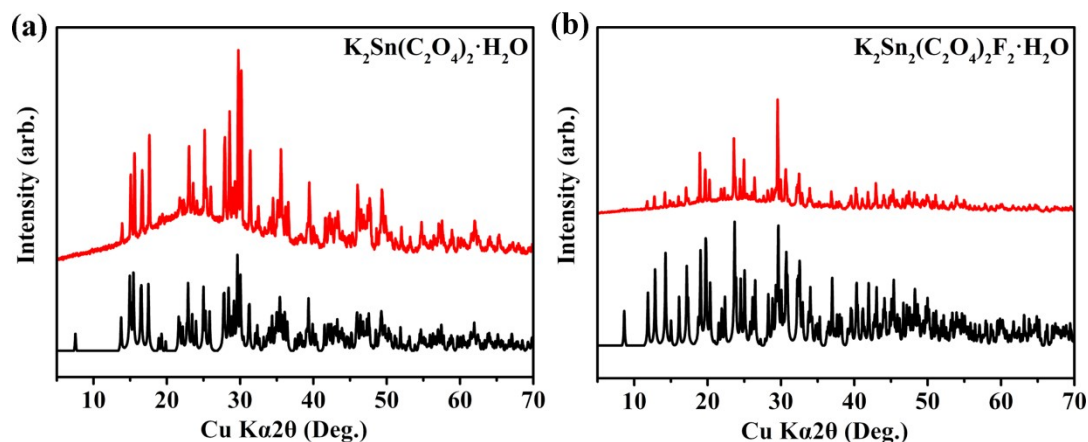

**Fig. S1** Powder XRD patterns of (a)  $\text{K}_2\text{Sn}(\text{C}_2\text{O}_4)_2 \cdot \text{H}_2\text{O}$  and (b)  $\text{K}_2\text{Sn}_2(\text{C}_2\text{O}_4)_2\text{F}_2 \cdot \text{H}_2\text{O}$ . The red curves are patterns of samples, the black are the simulated ones.



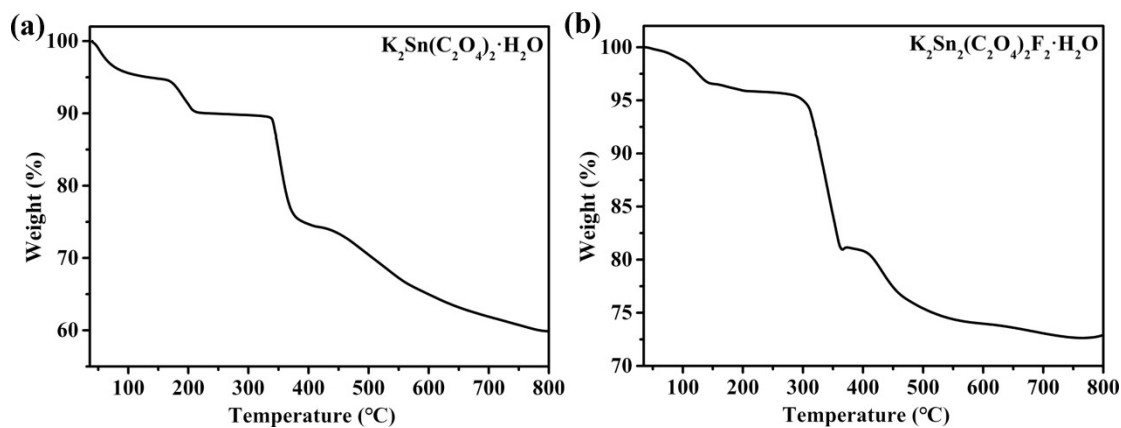

**Fig. S2** The TG curves of (a)  $\text{K}_2\text{Sn}(\text{C}_2\text{O}_4)_2 \cdot \text{H}_2\text{O}$  and (b)  $\text{K}_2\text{Sn}_2(\text{C}_2\text{O}_4)_2\text{F}_2 \cdot \text{H}_2\text{O}$ .

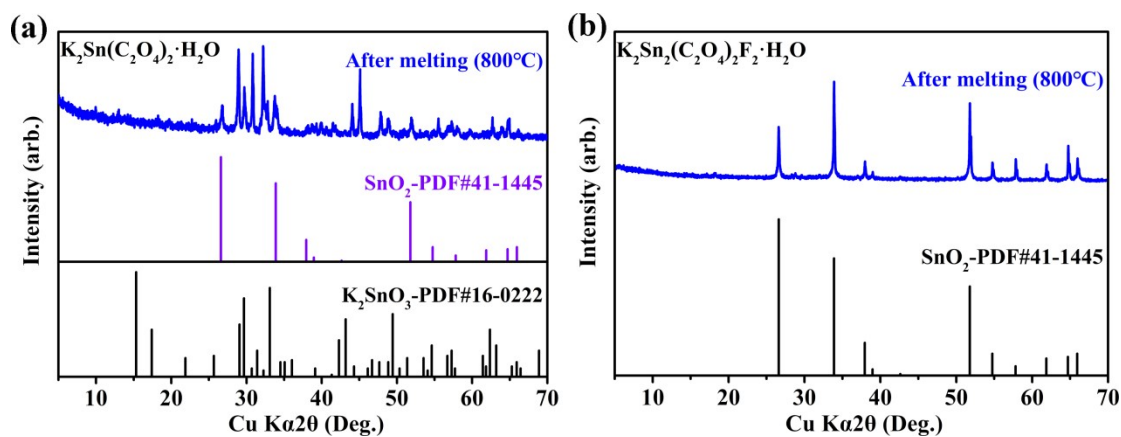

**Fig. S3** XRD patterns for compounds (a)  $\text{K}_2\text{Sn}(\text{C}_2\text{O}_4)_2 \cdot \text{H}_2\text{O}$  and (b)  $\text{K}_2\text{Sn}_2(\text{C}_2\text{O}_4)_2\text{F}_2 \cdot \text{H}_2\text{O}$  after melting.

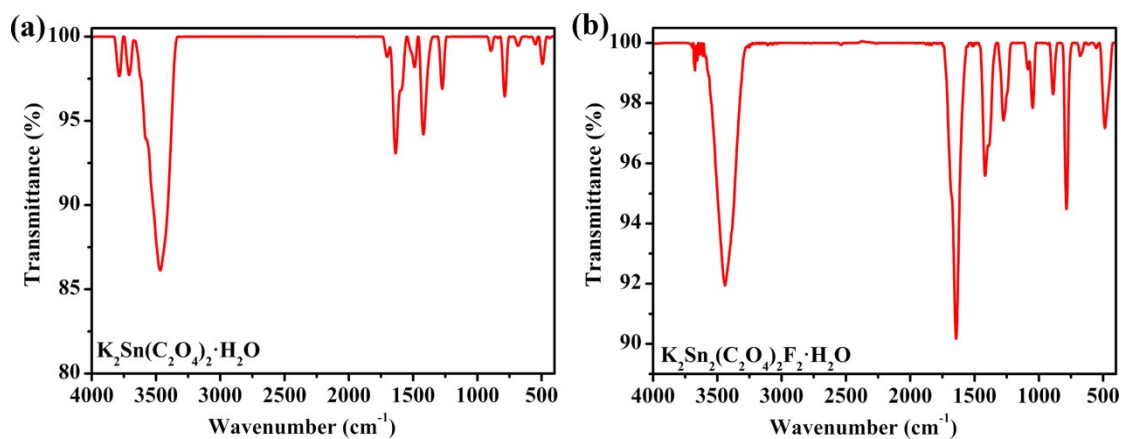

**Fig. S4** IR spectra of (a)  $\text{K}_2\text{Sn}(\text{C}_2\text{O}_4)_2 \cdot \text{H}_2\text{O}$  and (b)  $\text{K}_2\text{Sn}_2(\text{C}_2\text{O}_4)_2\text{F}_2 \cdot \text{H}_2\text{O}$ .

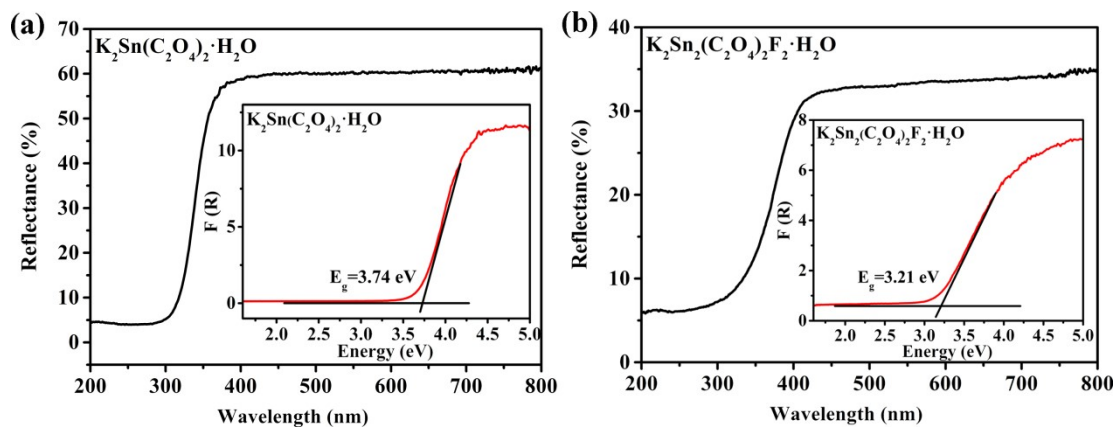

**Fig. S5** The UV-vis-NIR diffuse reflectance spectrum and band gap of (a)  $\text{K}_2\text{Sn}(\text{C}_2\text{O}_4)_2 \cdot \text{H}_2\text{O}$  and (b)  $\text{K}_2\text{Sn}_2(\text{C}_2\text{O}_4)_2\text{F}_2 \cdot \text{H}_2\text{O}$ .

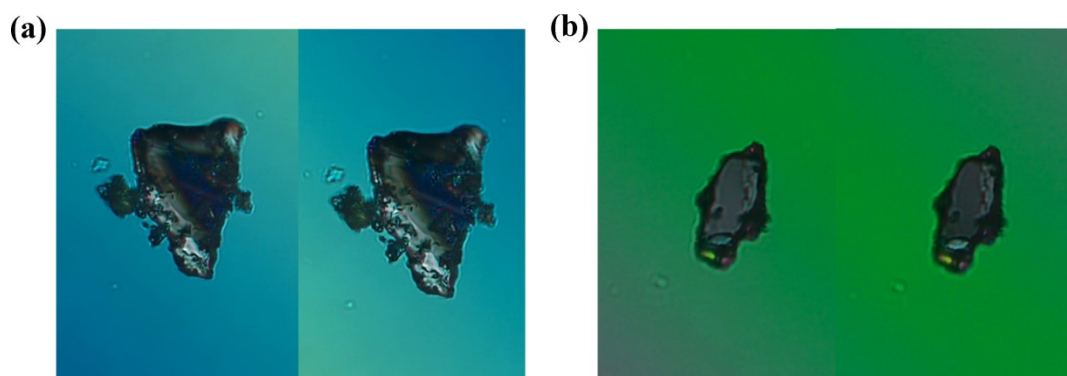

**Fig. S6** Birefringence measurement photo of (a)  $\text{K}_2\text{Sn}(\text{C}_2\text{O}_4)_2 \cdot \text{H}_2\text{O}$  and (b)  $\text{K}_2\text{Sn}_2(\text{C}_2\text{O}_4)_2\text{F}_2 \cdot \text{H}_2\text{O}$ .
